# Supplementary material for: Mononuclear gold(iii) complexes with diazanaphthalenes: the influence of the position of nitrogen atoms in the aromatic rings on the complex crystalline properties
Source: Royal Society of Chemistry journal article supplement (doi:10.1039/d0ra08731a), 2020-01-01
Supplement: d0ra08731a1.pdf [file d0ra08731a1.pdf]

**Mononuclear gold(III) complexes with diazanaphthalenes: the influence of  
the position of nitrogen atoms in the aromatic rings on the complex  
crystalline properties**

Biljana Đ. Glišić,<sup>a\*</sup> Beata Warzajtis,<sup>b</sup> Marcin Hoffmann,<sup>b</sup> Urszula Rychlewska<sup>b</sup> and

Miloš I. Djuran<sup>c</sup>

<sup>a</sup>*University of Kragujevac, Faculty of Science, Department of Chemistry, R. Domanovića 12,  
34000 Kragujevac, Serbia*

<sup>b</sup>*Faculty of Chemistry, Adam Mickiewicz University in Poznań, Uniwersytetu Poznańskiego 8,  
61-614 Poznań, Poland*

<sup>c</sup>*Serbian Academy of Sciences and Arts, Knez Mihailova 35, 11000 Belgrade, Serbia*

\*Corresponding author. *E-mail address:* [biljana.glisic@pmf.kg.ac.rs](mailto:biljana.glisic@pmf.kg.ac.rs) (B. Đ. Glišić).

**Abstract**

A series of mononuclear gold(III) complexes of the general formula  $[\text{AuCl}_3(\text{diazanaphthalene})]$ , where diazanaphthalene is quinazoline (qz, **1**), phthalazine (phtz, **2**), 1,5-naphthyridine (1,5-naph, **3**), 1,6-naphthyridine (1,6-naph, **4**) or 1,8-naphthyridine (1,8-naph, **5**), were prepared and fully characterized. The complexes **1–5** consist of discrete monomeric species with the Au(III) cation in a square planar coordination geometry surrounded by three chloride anions and one diazanaphthalene ligand. Crystallographic studies indicate the presence of an extended 4 + 1 or 4 + 2 geometry around the square planar  $[\text{AuCl}_3(\text{diazanaphthalene})]$  center due to  $\text{Au}\cdots\text{Cl}$  and  $\text{Au}\cdots\text{N}$  interactions. The crystal structures of these complexes are controlled by a variety of intermolecular interactions that utilize the amphiphilic properties of the coordinated chloride anions and involve C–H groups,  $\pi$ -electrons, and an uncoordinated nitrogen atom of the diazanaphthalene ligand. The usual offset  $\pi$ -stacking between the N-heteroaromatic ligands appears to be completely hindered between the 1,5-naph fragments and significantly weakened between the 1,6-naph and 1,8-naph in their respective complexes **3**, **4** and **5**, for which the average molecular polarizability ( $\alpha$ ) values are the lowest in the series. It is remarkable that the  $[\text{AuCl}_3(\text{benzodiazine})]$  complexes **1** and **2** form centrosymmetric crystals, but the  $[\text{AuCl}_3(\text{naphthyridine})]$  complexes **3–5** assemble into non-centrosymmetric aggregates, making them potential alternatives to the previously studied systems for application in various fields by taking advantage of their polarity.

*Keywords:* Gold(III) complexes; Diazanaphthalenes; Spectroscopy; X-ray crystallography; Non-centrosymmetric crystals; DFT calculations.

## TABLE OF CONTENTS

- Fig. S1** <sup>1</sup>H NMR spectra of (a) symmetrical 1,8-naph ligand and the corresponding gold(III) complex **5**, and (b) asymmetrical 1,6-naph ligand and the corresponding gold(III) complex **4** recorded in acetone-*d*<sub>6</sub> at ambient temperature (400 MHz). S4
- Table S1** Crystal data for complexes **1-5**. For all structures: molecular formula C<sub>8</sub>H<sub>6</sub>AuCl<sub>3</sub>N<sub>2</sub> and *MW* = 433.46. S5
- Table S2** Selected bond distances (Å) and valence angles (°) in gold(III) complexes with diazanaphthalene ligands **1-5**. DFT calculations were performed at M06-2X/(LanL2TZ(f)+cc-pVTZ)//M06-2X/(LanL2TZ(f)+cc-pVDZ) level of theory *in vacuo*. S7
- Table S3** Geometrical parameters describing Au⋯Cl and Cl⋯Cl interactions in **1-5**. S8
- Table S4** Geometrical parameters for the shortest intra- and intermolecular hydrogen bonds. S9
- Table S5** Geometrical parameters describing π⋯π interactions in **1, 2, 4** and **5**.\* S11

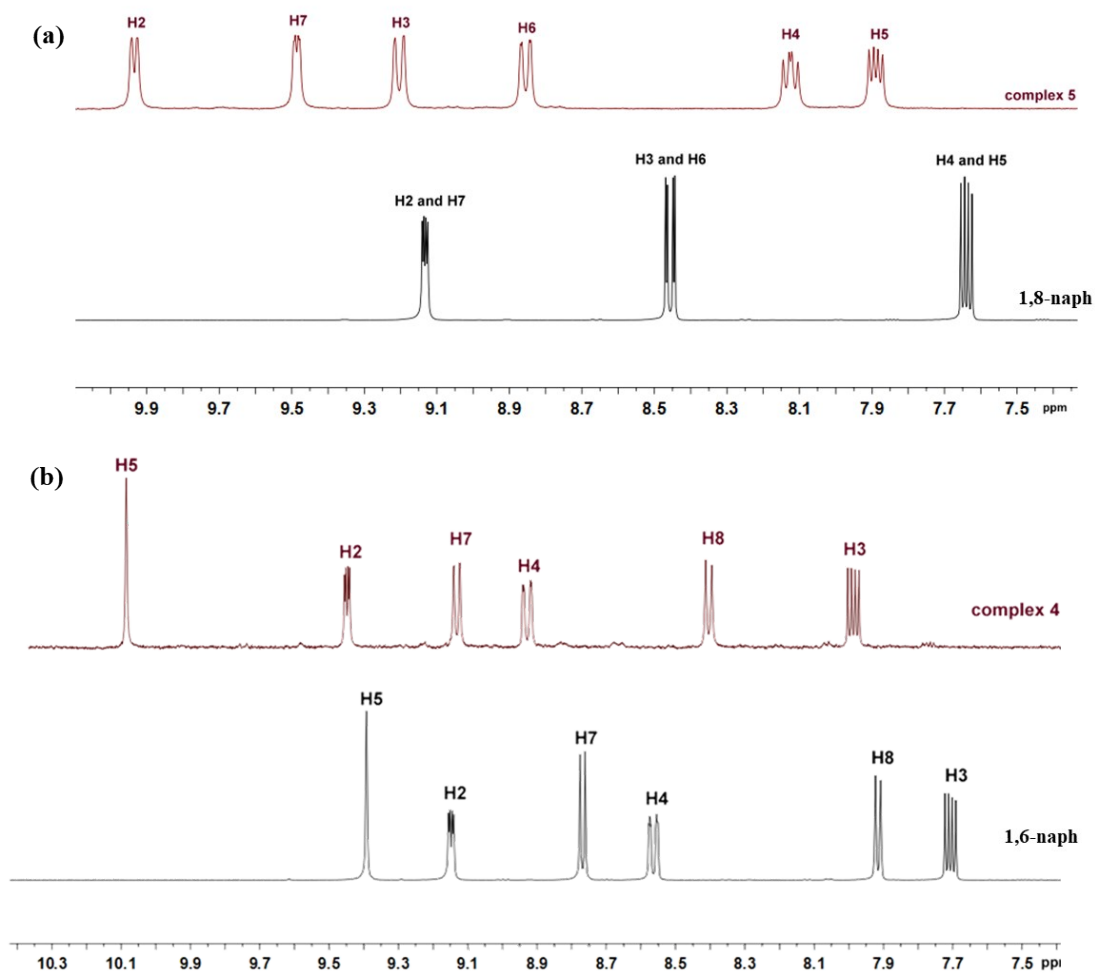

**Fig. S1** <sup>1</sup>H NMR spectra of (a) symmetrical 1,8-naph ligand and the corresponding gold(III) complex **5**, and (b) asymmetrical 1,6-naph ligand and the corresponding gold(III) complex **4** recorded in acetone-*d*<sub>6</sub> at ambient temperature (400 MHz).

**Table S1** Crystal data for complexes **1-5**. For all structures: molecular formula  $C_8H_6AuCl_3N_2$  and  $MW = 433.46$ .

|                                                                            | <b>1</b>                            | <b>2</b>                             | <b>3</b>                             | <b>4</b>                             | <b>5</b>                             |
|----------------------------------------------------------------------------|-------------------------------------|--------------------------------------|--------------------------------------|--------------------------------------|--------------------------------------|
| Crystal data                                                               |                                     |                                      |                                      |                                      |                                      |
| Crystal system, space group                                                | Triclinic, $P\bar{1}$               | Triclinic, $P\bar{1}$                | Orthorhombic, $Pna2_1$               | Monoclinic, $P2_1$                   | Monoclinic, $Cc$                     |
| $a, b, c$ (Å)                                                              | 7.6012(4),<br>7.6086(5), 9.9648(4)  | 7.8424(4), 8.1614(4),<br>9.7794(5)   | 12.9111(4), 12.1129(4),<br>6.7647(2) | 4.0553(1), 11.2233(2),<br>11.6686(3) | 7.5601(2), 22.2124(5),<br>13.5335(3) |
| $\alpha, \beta, \gamma$ (°)                                                | 111.477(5), 92.248(4),<br>92.294(5) | 113.353(5), 95.989(4),<br>104.639(4) | 90,<br>90,<br>90                     | 90,<br>93.193(2),<br>90              | 90,<br>103.107(3),<br>90             |
| $V$ (Å <sup>3</sup> )                                                      | 534.96(5)                           | 541.06(5)                            | 1057.94(6)                           | 530.26(2)                            | 2213.45(9)                           |
| $Z$                                                                        | 2                                   | 2                                    | 4                                    | 2                                    | 8                                    |
| $D_x$ (Mg m <sup>-3</sup> )                                                | 2.691                               | 2.661                                | 2.721                                | 2.715                                | 2.601                                |
| Packing Index [%]                                                          | 69.1                                | 69.8                                 | 70.7                                 | 70.5                                 | 67.5                                 |
| $\mu$ (mm <sup>-1</sup> )                                                  | 14.46                               | 14.29                                | 14.62                                | 14.59                                | 13.98                                |
| Crystal size (mm)                                                          | 0.35 × 0.18 × 0.10                  | 0.20 × 0.20 × 0.10                   | 0.23 × 0.20 × 0.16                   | 0.23 × 0.20 × 0.05                   | 0.35 × 0.25 × 0.10                   |
| Data collection                                                            |                                     |                                      |                                      |                                      |                                      |
| $T_{\min}, T_{\max}$                                                       | 0.045, 0.293                        | 0.050, 0.216                         | 0.074, 0.210                         | 0.324, 0.733                         | 0.023, 0.338                         |
| No. of measured, independent and observed [ $I > 2\sigma(I)$ ] reflections | 8983, 1874, 1774                    | 9111, 1914, 1817                     | 7169, 1871, 1747                     | 9371, 1878, 1828                     | 22331, 3878, 3804                    |
| $R_{\text{int}}$                                                           | 0.044                               | 0.038                                | 0.027                                | 0.042                                | 0.051                                |
| $(\sin \theta/\lambda)_{\text{max}}$ (Å <sup>-1</sup> )                    | 0.595                               | 0.595                                | 0.595                                | 0.595                                | 0.595                                |

| Refinement                                                         |                       |                       |                               |                                                                |                               |
|--------------------------------------------------------------------|-----------------------|-----------------------|-------------------------------|----------------------------------------------------------------|-------------------------------|
| $R[F^2 > 2\sigma(F^2)]$ ,<br>$wR(F^2)$ , $S$                       | 0.020, 0.044,<br>1.07 | 0.018, 0.040,<br>1.12 | 0.017, 0.035,<br>1.06         | 0.020, 0.047, 1.08                                             | 0.020, 0.044, 1.04            |
| No. of reflections                                                 | 1874                  | 1914                  | 1871                          | 1878                                                           | 3878                          |
| No. of parameters                                                  | 128                   | 128                   | 128                           | 127                                                            | 254                           |
| No. of restraints                                                  | 0                     | 0                     | 1                             | 1                                                              | 2                             |
| $\Delta\rho_{\max}$ , $\Delta\rho_{\min}$ ( $e \text{ \AA}^{-3}$ ) | 0.88, -0.70           | 0.65, -0.64           | 0.38, -0.49                   | 0.53, -0.68                                                    | 0.39, -0.49                   |
| Absolute structure                                                 | –                     | –                     | Refined as an inversion twin. | Flack x determined using 838 quotients [(I+)-(I-)]/[(I+)+(I-)] | Refined as an inversion twin. |
| Absolute structure parameter                                       | –                     | –                     | 0.608(14)                     | -0.030(6)                                                      | 0.442(11)                     |

**Table S2** Selected bond distances (Å) and valence angles (°) in gold(III) complexes with diazaphthalene ligands **1-5**. DFT calculations were performed at M06-2X/(LanL2TZ(f)+cc-pVTZ)//M06-2X/(LanL2TZ(f)+cc-pVDZ) level of theory *in vacuo*.

| 1          |        |            | 2          |        |            | 3          |        |            | 4          |        |            | 5          |        |            |            |
|------------|--------|------------|------------|--------|------------|------------|--------|------------|------------|--------|------------|------------|--------|------------|------------|
|            | calc.  | X-ray      |            |
| Au—C11     | 2.303  | 2.2819(13) | Au—C11     | 2.314  | 2.2724(13) | Au—C11     | 2.308  | 2.283(2)   | Au—C11     | 2.308  | 2.277(3)   | Au—C11     | 2.307  | 2.275(3)   | 2.281(3)   |
| Au—C12     | 2.255  | 2.2590(13) | Au—C12     | 2.256  | 2.2662(12) | Au—C12     | 2.257  | 2.2709(18) | Au—C12     | 2.256  | 2.258(2)   | Au—C12     | 2.257  | 2.257(3)   | 2.265(3)   |
| Au—C13     | 2.309  | 2.2698(12) | Au—C13     | 2.297  | 2.2797(12) | Au—C13     | 2.303  | 2.2763(19) | Au—C13     | 2.303  | 2.275(3)   | Au—C13     | 2.307  | 2.268(3)   | 2.271(3)   |
| Au—N3      | 2.097  | 2.049(4)   | Au—N2      | 2.070  | 2.027(4)   | Au—N1      | 2.083  | 2.053(6)   | Au—N6      | 2.096  | 2.057(8)   | Au—N1      | 2.081  | 2.052(9)   | 2.037(8)   |
| N1—C2      | 1.300  | 1.297(6)   | N2—N3      | 1.344  | 1.372(5)   | N1—C2      | 1.418  | 1.337(11)  | N6—C5      | 1.322  | 1.320(12)  | N1—C2      | 1.318  | 1.323(14)  | 1.328(12)  |
| N1—C9      | 1.365  | 1.351(6)   | N2—C1      | 1.313  | 1.308(6)   | N1—C9      | 1.372  | 1.361(12)  | N6—C7      | 1.371  | 1.362(13)  | N1—C9      | 1.369  | 1.366(13)  | 1.384(12)  |
| N3—C2      | 1.378  | 1.367(6)   | N3—C4      | 1.306  | 1.301(6)   | N5—C6      | 1.311  | 1.324(14)  | N1—C2      | 1.313  | 1.326(16)  | N8—C8      | 1.313  | 1.338(14)  | 1.335(14)  |
| N3—C4      | 1.321  | 1.322(6)   |            |        |            | N5—C10     | 1.361  | 1.355(11)  | N1—C9      | 1.361  | 1.344(16)  | N8—C9      | 1.348  | 1.322(13)  | 1.341(13)  |
| N3—Au—C11  | 89.77  | 91.72(11)  | N2—Au—C11  | 87.75  | 89.80(11)  | N1—Au—C11  | 88.92  | 89.64(17)  | N6—Au—C11  | 89.55  | 89.6(3)    | N1—Au—C11  | 88.37  | 88.5(3)    | 88.5(2)    |
| N3—Au—C12  | 179.70 | 178.03(11) | N2—Au—C12  | 179.40 | 176.18(11) | N1—Au—C12  | 179.30 | 178.0(3)   | N6—Au—C12  | 179.83 | 178.5(3)   | N1—Au—C12  | 179.36 | 179.0(3)   | 178.0(3)   |
| N3—Au—C13  | 89.25  | 88.56(11)  | N2—Au—C13  | 89.37  | 88.22(10)  | N1—Au—C13  | 88.28  | 88.31(17)  | N6—Au—C13  | 89.71  | 89.3(3)    | N1—Au—C13  | 87.90  | 90.2(3)    | 90.2(2)    |
| C11—Au—C12 | 90.50  | 90.24(6)   | C11—Au—C12 | 91.65  | 91.52(5)   | C11—Au—C12 | 91.24  | 91.75(8)   | C11—Au—C12 | 90.35  | 89.56(11)  | C11—Au—C12 | 91.89  | 91.21(12)  | 90.88(12)  |
| C11—Au—C13 | 178.77 | 178.36(5)  | C11—Au—C13 | 175.99 | 178.01(5)  | C11—Au—C13 | 176.97 | 174.80(9)  | C11—Au—C13 | 179.11 | 178.41(10) | C11—Au—C13 | 175.86 | 178.67(13) | 178.68(13) |
| C12—Au—C13 | 90.47  | 89.49(5)   | C12—Au—C13 | 91.23  | 90.46(5)   | C12—Au—C13 | 91.55  | 90.42(7)   | C12—Au—C13 | 90.39  | 91.50(11)  | C12—Au—C13 | 91.83  | 90.12(12)  | 90.43(12)  |
| Au—N3—C2   | 120.59 | 120.5(3)   | Au—N2—C1   | 120.92 | 120.9(3)   | Au—N1—C2   | 117.42 | 116.5(6)   | Au—N6—C5   | 119.92 | 119.0(7)   | Au—N1—C2   | 121.91 | 121.4(8)   | 124.4(7)   |
| Au—N3—C4   | 120.87 | 120.9(3)   | Au—N2—N3   | 115.58 | 115.8(3)   | Au—N1—C9   | 122.29 | 121.8(6)   | Au—N6—C7   | 120.11 | 120.7(6)   | Au—N1—C9   | 117.58 | 116.5(7)   | 115.8(6)   |
| C2—N3—C4   | 118.53 | 118.4(4)   | C1—N2—N3   | 123.49 | 122.9(4)   | C2—N1—C9   | 120.28 | 121.7(7)   | C5—N6—C7   | 119.98 | 120.3(8)   | C2—N1—C9   | 120.50 | 122.0(10)  | 119.8(9)   |
| C2—N1—C9   | 117.75 | 118.2(4)   | N2—N3—C4   | 117.71 | 116.0(4)   | C6—N5—C10  | 117.29 | 118.5(8)   | C2—N1—C9   | 116.70 | 117.3(9)   | C8—N8—C9   | 117.16 | 115.9(10)  | 114.8(10)  |

**Table S3** Geometrical parameters describing Au···Cl and Cl···Cl interactions in **1-5**.

| Cl···Cl<br>Au···Cl | X···X [Å] | d [Å]    | $\theta_1 / \theta_2$ [°]* | Symmetry<br>operations  |
|--------------------|-----------|----------|----------------------------|-------------------------|
| <b>1</b>           | Cl1···Cl3 | 3.582(2) | 138.47(7) / 137.54(6)      | $x+1, +y, +z$           |
|                    | Cl3···Cl3 | 3.462(2) | 132.68(8) / 132.68(8)      | $-x+1, -y+1, -z+2$      |
|                    | Cl1···Au1 | 3.295(2) |                            | $-x+2, -y, -z+2$        |
|                    | Cl2···Au1 | 3.665(2) |                            | $-x+2, -y+1, -z+2$      |
| <b>2</b>           | Cl1···Cl3 | 3.444(2) | 158.32(7) / 156.37(6)      | $x+1, +y, +z$           |
|                    | Cl2···Cl2 | 3.548(2) | 136.77(8) / 136.77(8)      | $-x+1, -y, -z$          |
|                    | Cl3···Au1 | 3.530(2) |                            | $-x+1, -y+1, -z+1$      |
| <b>3</b>           | Cl1···Cl2 | 3.721(3) | 110.03(8) / 175(9)         | $x+1/2, -y+1/2, +z$     |
|                    | Cl2···Cl3 | 3.694(4) | 59.78(8) / 108.35(8)       | $-x+1, -y, +z+1/2$      |
|                    | Cl3···Cl3 | 3.684(3) | 73.83(9) / 59.96(8)        | $-x+1, -y, +z-1/2$      |
|                    | Cl3···Au1 | 3.218(2) |                            | $-x+1, -y, +z-1/2$      |
| <b>4</b>           | Cl1···Cl2 | 3.328(4) | 141.49(12) / 169.22(14)    | $-x+1, +y-1/2, -z+1$    |
|                    | Cl1···Au1 | 3.427(3) |                            | $x+1, +y, +z$           |
|                    | Cl3···Au1 | 3.378(3) |                            | $x-1, +y, +z$           |
| <b>5</b>           | Cl1···Au2 | 3.465(3) |                            | $x-1/2, -y+1/2, +z-1/2$ |
|                    | Au1···Cl4 | 3.553(3) |                            | $x-1/2, -y+1/2, +z-1/2$ |
|                    | Cl3···Cl5 | 3.684(4) | 165.06(14) / 115.71(14)    |                         |
|                    | Cl4···Cl6 | 3.731(4) | 109.91(12) / 163.25(14)    | $x, -y+1, +z+1/2$       |

\* $\theta_1$  and  $\theta_2$  are two Au-Cl···Cl angles



**Table S4** Geometrical parameters for the shortest intra- and intermolecular hydrogen bonds.

|                   | D–H<br>[Å] | H···A [Å] | D···A [Å] | D–H···A<br>[°] | Symmetry<br>operations on A |
|-------------------|------------|-----------|-----------|----------------|-----------------------------|
| <b>1_qz</b>       |            |           |           |                |                             |
| C2–H2···C11       | 0.93       | 2.76      | 3.247(5)  | 114            |                             |
| C4–H4···C13       | 0.93       | 2.72      | 3.104(4)  | 105            |                             |
| C2–H2···N1        | 0.93       | 2.49      | 3.167(7)  | 129            | $-x+2, -y, -z+1$            |
| C6–H6···C12       | 0.93       | 2.90      | 3.524(5)  | 126            | $x-1, +y-1, +z-1$           |
| C7–H7···C12       | 0.93       | 2.91      | 3.531(5)  | 126            | $x-1, +y-1, +z-1$           |
| <b>2_phtz</b>     |            |           |           |                |                             |
| C1–H1···C11       | 0.93       | 2.85      | 3.740(6)  | 161            | $-x+2, -y+1, -z+1$          |
| C1–H1···C13       | 0.93       | 2.89      | 3.469(7)  | 122            | $-x+1, -y+1, -z+1$          |
| C4–H4···C12       | 0.93       | 2.98      | 3.847(6)  | 156            | $x, +y, +z+1$               |
| C4–H4···C12       | 0.93       | 2.95      | 3.524(6)  | 121            | $-x+1, -y, -z+1$            |
| C5–H5···C12       | 0.93       | 3.00      | 3.846(6)  | 151            | $-x+1, -y, -z+1$            |
| C6–H6···C13       | 0.93       | 2.97      | 3.645(6)  | 130            | $-x+1, -y+1, -z+2$          |
| C7–H7···C13       | 0.93       | 2.86      | 3.725(4)  | 155            | $x+1, +y+1, +z+1$           |
| <b>3_1,5-naph</b> |            |           |           |                |                             |
| C8–H8···C11       | 0.93       | 2.98      | 3.471(8)  | 114            |                             |
| C4–H4···N5        | 0.93       | 2.58      | 3.340(11) | 139            | $-x+2, -y, +z+1/2$          |
| C2–H2···C12       | 0.93       | 2.90      | 3.730(9)  | 149            | $-x+1, -y, +z+1/2$          |
| C2–H2···C13       | 0.93       | 2.58      | 3.752(9)  | 144            | $-x+1, -y, +z+1/2$          |
| C8–H8···C13       | 0.93       | 2.88      | 3.285(8)  | 108            | $-x+1, -y, +z-1/2$          |
| <b>4_1,6-naph</b> |            |           |           |                |                             |
| C5–H5···C11       | 0.93       | 2.98      | 3.307(10) | 102            |                             |
| C7–H7···N1        | 0.93       | 2.66      | 3.551(15) | 160            | $-x+1, +y+1/2, -z+2$        |
| C2–H2···C13       | 0.93       | 3.03      | 3.864(11) | 150            | $x, +y-1, +z$               |
| C3–H3···C12       | 0.93       | 3.00      | 3.907(12) | 164            | $x-1, +y-1, +z$             |
| C4–H4···C11       | 0.93       | 2.90      | 3.610(12) | 134            | $-x, +y-1/2, -z+1$          |
| C4–H4···C12       | 0.93       | 3.05      | 3.935(12) | 160            | $-x, +y-1/2, -z+1$          |
| C5–H5···C11       | 0.93       | 2.84      | 3.506(10) | 130            | $x-1, +y, +z$               |
| C8–H8···C13       | 0.93       | 2.92      | 3.770(10) | 153            | $-x+1, +y-1/2, -z+2$        |
| <b>5_1,8-naph</b> |            |           |           |                |                             |
| C7–H7···N18       | 0.93       | 2.70      | 3.301(14) | 124            | $x, -y+1, +z-1/2$           |
| C2–H2···C14       | 0.93       | 2.84      | 3.683(13) | 152            | $x-1/2, -y+1/2, +z-1/2$     |
| C2–H2···C15       | 0.93       | 3.02      | 3.511(13) | 115            | $x-1/2, -y+1/2, +z-1/2$     |
| C3–H3···C11       | 0.93       | 2.97      | 3.882(14) | 168            | $x-1, +y, +z$               |
| C5–H5···C14       | 0.93       | 3.01      | 3.662(11) | 128            | $x-1, +y, +z-1$             |
| C5–H5···C16       | 0.93       | 2.81      | 3.634(14) | 149            | $x-1, -y+1, +z-1/2$         |
| C7–H7···C16       | 0.93       | 2.98      | 3.751(14) | 141            | $x, -y+1, +z-1/2$           |
| C17–H17···N8      | 0.93       | 2.65      | 3.283(14) | 126            | $x, -y+1, +z+1/2$           |
| C12–H12···C11     | 0.93       | 2.80      | 3.631(11) | 149            | $x+1/2, -y+1/2, +z+1/2$     |
| C13–H13···C14     | 0.93       | 2.95      | 3.870(13) | 170            | $x+1, +y, +z$               |

*Electronic Supplementary Information*

|               |      |      |           |     |                     |
|---------------|------|------|-----------|-----|---------------------|
| C15–H15···C13 | 0.93 | 2.78 | 3.605(13) | 148 | $x+1,-y+1,+z+1/2$   |
| C15–H15···C15 | 0.93 | 3.04 | 3.667(11) | 126 | $x+1,-y+1,+z+1/2$   |
| C16–H16···C11 | 0.93 | 2.82 | 3.319(11) | 115 | $x+1/2,+y+1/2,+z+1$ |
| C17–H17···C13 | 0.93 | 2.92 | 3.656(14) | 138 | $x,-y+1,+z+1/2$     |

---

**Table S5** Geometrical parameters describing  $\pi \cdots \pi$  interactions in **1**, **2**, **4** and **5**.\*

|          | h(Å)  | r(Å)  | $\Theta(^{\circ})$ | Symmetry code     |
|----------|-------|-------|--------------------|-------------------|
| <b>1</b> |       |       |                    |                   |
| Ar/Ar    | 3.381 | 1.348 | 0                  | $-x+1,-y-1,-z+1$  |
| Ar/Pm    | 3.469 | 1.189 | 0                  | $-x+1,-y,-z+1$    |
| <b>2</b> |       |       |                    |                   |
| Ar/Ar    | 3.447 | 1.109 | 0                  | $-x+2,-y+1,-z+2$  |
| Ar/Pz    | 3.447 | 1.268 | 0                  | $-x+2,-y+1,-z+2$  |
| <b>4</b> |       |       |                    |                   |
| Py/Py    | 3.617 | 1.793 | 0                  | $x+1,y,z$         |
| Py/Py    | 3.617 | 1.833 | 0                  | $x+1,y,z$         |
| <b>5</b> |       |       |                    |                   |
| Py/Py    | 3.686 | 1.249 | 1.8                | $x-1,-y+1,+z-1/2$ |

\*Ar = arene ring;

Pm = pyrimidine ring;

Pz = pyridazine ring;

Py = pyridine ring;

h = distance between planes defined by diazanaphthalene fragments;

r = displacement parameter defined as a distance between the centers of the six-membered rings engaged in stack projected on a plane defined by atoms of one of the two interacting rings;

$\Theta$  = inclination of one ring plane in relation to the other ring plane.
